# Supplementary material for: Expression of a poriferan potassium channel: insights into the evolution of ion channels in metazoans
Source: Oxford University Press journal article supplement (doi:10.1242/jeb.026971), 2009-02-27
Supplement: jeb026971-sup-026971-figs1.pdf [file jeb026971-sup-026971-figs1.pdf]

AmqKirA ---MEPAHKVNYELVSNSSN----ENIHRDDVPITFRG---TREARRR-ERLVKRSNGR 48  
 AmqKirB ---MSVQFSNS-YEKISETEGTVREEATDAAPTIVSFQP---TVPTRLRPERLVKRSTAR 53  
 Nv1 -----KRRLLIGKKKGTV 11  
 Nv2 -----RLVSRRGKV 9  
 Nv3 -----RLR-PRLVGKHGGL 13  
 Nv4 -----  
 rKir1.1 -----MGASERSVFRVLIRALTERMFKHLRRWFITHIFGRSRQARIVSKEGRC 49  
 mKir2.1 ----MGSVRTNRYISVSSEEDGMKLATMA--VANGFGNGSKVHTRQQCRSRFVKKDGHG 54  
 hKir2.2 ---MTAASRANPYSIVSSEEDGLHLVTMS--GANGFGNG--KVHTRRRRCNRNFVKKNGQC 53  
 hKir3.1 -MSALRRKFGDDYQVVTSSSSGSLQPQG---PGQDPQQQLVP--KKKRQRFVDKNGRC 53  
 hKir3.4 MAGDSRNAMNQDMEIGVTPWDPKIPKQARDYVPIATDRTRLLAEGKKPRQRYMEKSGKC 60  
 hKir4.1 -----MTSVAKVYYSQTTQTESRPLMGPGRIRRRRVLTGDGRS 37  
 hKir5.1 ----MSYYGSSYHIINAD---AKYPGYP--PEH-----ITAEKRRARRRLLHKDGS 43  
 hKir6.2 -----MLSRKGIPEEYVLRLEADP--AKP-----RYRARQRRARFVSKKGC 42  
 hKir7.1 -----MDSSNCKVIAPLLSQ--RYRRMVTKDGHS 27

M1

AmqKirA SLVHHHNIPPLSLLGYISDGFTTVLNARWVITLLFAAMYVLSWLLFGFIWGWIDISAYVA 108  
 AmqKirB SLVHHKNIPPLSWLAVSISDGFTTLNAEWYIITGLFSAVYLSWLLFTFMWWSFDAAYVS 113  
 Nv1 NIVS-DVP--RRPQLYLADHFTTLLDARWRYVFLIFTVSFLVSWLIFGSLWGWVLYRQK 68  
 Nv2 NVTAANVE--NKKALYLADPFTTLLDAKWGWIFLAFASGFVTSWLFVGLTWMMIVKLRT 67  
 Nv3 KVVAATVAQKHG--MYLSDLFMTMIDSKWRWISLFFITAYTGSWMGFVGVWY---LITYL 68  
 Nv4 -----MIDMKWHVYVILLFCVSYILSWVLFGTIWW---LIVLS 34  
 rKir1.1 NIEFGNVD-AQSRFIFVDIWTTLVLDLKWRYKMTVFITAFVLSWFLFGLLWYVVAHVHKD 108  
 mKir2.1 NVQFINVG--EKGQRYLADIFTTCVDIRWRWMLVIFCLAFVLSWLFVGFVFWLIALLHGD 112  
 hKir2.2 NIEFANMD--EKSQRYLADMFTTCVDIRWRWMLLIFSLAFLASWLLFGIIFVWIAVAHGD 111  
 hKir3.1 NVQHGNLG--SETSRYLSDLFTTLLVDLKWRYNLFIFILTYTVAWLFMASMWWVIAATR 111  
 hKir3.4 NVHHGNV---QETYRYLSDLFTTLLVDLKWRYNLLVFTMVYTVTWLFFGFVWVLAIAIRGD 117  
 hKir4.1 NVRMEHI--ADKRFYPLKDLWTFIDMQWRKLLLFSAFAGTWFLFGVWVYLVAVAHGD 95  
 hKir5.1 NVYFKHIF--GEWGSYVDIFTTLLVDLKWRYMVFVIFSLSYILSWLIFGSVFWLIAFHGD 101  
 hKir6.2 NVAHKNIR--EQ-GRFLQDVFETTLVDLKWPHLLIFTMSFLCSWLLFAMAWVLAFAHGD 99  
 hKir7.1 TLQMDG---AQRGLAYLRDANGILMDMRWRWMLVFSASFVHVHLVFAVLWYVLAEMNGD 84

V

P

M2

AmqKirA VTNSS-----CVSNIDGFSASFLFSIETQVTIGYGRFVADDCSFGILILVIQCL 158  
 AmqKirB VTNNS-----CIENVGGFSSSFLFSIETQVTIGYGRHYIQSTCHFIFLLVQSL 163  
 Nv1 YFNIE-----CIKVDSWTS AFLFSIETQVTIGYGRQVTPHCPEGVFLLIVQCI 118  
 Nv2 FDTAS-----CVDNVDSWIS AFLFSIETQVTIGYGRQVTPHCPEGVVCLLVQSL 117  
 Nv3 RGGNY-----CVHNVESFVIAFLFSIETQVTIGYGRQISGECPAIIILLNIQSL 118  
 Nv4 RGKSV-----CFDQVDDWTTAFLFSIETQVTIGYGRSRTITSKCAEAIITLQVQSI 84  
 rKir1.1 LPEFY---PPDNRTPCVENINGMST AFLFSIETQVTIGYGRFRVTEQCATAIFLLIFQSI 165  
 mKir2.1 LDTS-----KVSACVSEVNSFTAFLFSIETQVTIGYGRFVTEQCATAIFVVFQSI 166  
 hKir2.2 LEPAEG---RGRTPCVMQVHGFM AAFLSIETQVTIGYGLRCVTEECPPAVFMVVAQSI 167  
 hKir3.1 LNKAHV---GNYTPCVANVYNFPAFLFFIETEATIGYGRYITDKCEPIILFLFQSI 167  
 hKir3.4 LDHVGD---QEWIPCVENLSGFVSAFLFSIETETTIGYGRVITEKCEPIILLVQAI 173  
 hKir4.1 LLELD---PPANHTPCVQVHLLTGAFLSLESQTTIGYGRYISEECPLAIVLLIAQLV 152  
 hKir5.1 LLND-----PDITPCVDNVSFTGAFLSIETQVTIGYGRVTEECPSVAVLMVILQSI 155  
 hKir6.2 LAPSE-----GTAEP CVTSLHSFSSAFLFSIEVQVTIGYGRMVTEECPLAILLIVQNI 154  
 hKir7.1 -LELDHDAPPENHTICVKYIITSFTAASFSLQTLTIGYGMTFSPGDCPSAIALLAIQML 143

M2

AmqKirA VGLVIDSFLIGLIFAKITRPNRRKTIIFSDTACINVNKGEKRLQFRIGDVRSSSLVE 218  
 AmqKirB IGLFIDSFLIGLIFAKISRPNRKTIIFSIDIACINVNAKGERCLQFRVADVRKNSSLVE 223  
 Nv1 VGLIISSTMI GLIFAKLSRPHLRGRTVLF SNHGVIALRD-GKLCLMFRVGDIRTKSOLIE 177  
 Nv2 SGLMISASLIGLIFAKLSRPPRAHTIRFSKRAVVSQRD-GKLCIFRVGDIR-KSOLLE 175  
 Nv3 SGFLINALIMGLIFAKLSRPNRAETILFSKKALVCVRD-GKMCLTFRVGDIRK-SQILH 176  
 Nv4 VGDIIIDAFMLGLTFAKLSRPRERARTVKSRYASICLRD-GKMCLMFRVGDVRK-SQIVE 142  
 rKir1.1 LGVIINSFMCGAILAKISRPKRKAKTITFSKNAVISKRG-GKLCILIRVANLR-KSLLIG 223  
 mKir2.1 VGCIIIDAFIIGAVMAKMAKPKRNETLVSFNNAVIMRD-GKLCLMWRVGNLR-KSHLVE 224  
 hKir2.2 VGCIIIDSFMI GAIMAKMARPKKRAOITLFSHNAVVALRD-GKLCLMWRVGNLR-KSHIVE 225  
 hKir3.1 LGSIVDAFLIGCMFIKMSOPKKRAETLMFSEHAVISM RD-GKLTLMFRVGNLR-NSHMVS 225  
 hKir3.4 LGSIVNAFMVGC MFVKISOPKKRAETLMFSNNAVISM RD-EKLCLMFRVGDLR-NSHIVE 231  
 hKir4.1 LTTILEITFTIGTFQAKIARPKKRAETIRFSQHAVVASHN-GKPCLMIRVANMR-KSLLIG 210  
 hKir5.1 LSCIINTFIIIGAALAKMATAKRAOITIRFSYFALIGMRD-GKLCLMWRIGDFR-PNHVVE 213  
 hKir6.2 VGLMINAIMGCI FMKTAQAHRRAETLIFS KHAVIALRH-GRLCFMLRVGDLR-KSMIIS 212  
 hKir7.1 LGLMLEAFITGAFVAKIARPKNRAFSIRFTDTAVVAHMD-GKPNLIFOVANTR-PSPLTS 201

\*

\*

|         |                                                              |     |
|---------|--------------------------------------------------------------|-----|
| AmqKirA | AHVRVQLYWNKDGEDFYRLEQNDLEVGVDSG-TDR-----IILLT-----PVVITHI    | 266 |
| AmqKirB | AHVRVQLYWHKDGATDEYRLEQNDLEVGVDSG-TDR-----IILLT-----PVVITHI   | 271 |
| Nv1     | SHMRAVVRRCCTKEGKEIGFFOQGLPLRHDLI-----CEEEKIN--LFIPAIVVHE     | 228 |
| Nv2     | VTVRLHCFEYIAGDNG-SLFFNOSELPIAFSPE-----CEPEYEVRFPLTPTIMHM     | 227 |
| Nv3     | CHIRVQLFRTRKTKEGQVLPFYQODLKTGIDWN--DQNYGNNTIFLIL-----PLTIIHV | 229 |
| Nv4     | AHTRAQLFRYLETSEGTSMPFYQDLRLCYDWRNCDRDDNRNHIFLLM-----PLVVMHI  | 197 |
| rKir1.1 | SHIYKLLKTTITPEGETIILDQTNINFFVD-----AGNENLFFIS-----PLTIYHI    | 271 |
| mKir2.1 | AHVRAQLKRSRITSEGEYIPLDQIDINVGFDSDG-----IDRIFLVS-----PITIVHE  | 272 |
| hKir2.2 | AHVRAQLKRPVITEGEYIPLDQIDINVGFDKG-----LDRIFLVS-----PITILHE    | 273 |
| hKir3.1 | AQTRCKLLKSRQTPGEFEIPLDQLELDVGFSTG-----ADQLFLVS-----PLTICHV   | 273 |
| hKir3.4 | ASIRAKLKRQTPKEGEFIPLNQIDINVGFDTG-----DDRIFLVS-----PLIISHE    | 279 |
| hKir4.1 | CQVTCQLLQTHQTKEGENIRLNQVNVTFQVD-----TASDSPFLIL-----PLTFYHV   | 258 |
| hKir5.1 | CTVRAQLLRYTEDESEG-RMTWAFKDKLVN-----DQIILVT-----PVTIVHE       | 256 |
| hKir6.2 | ATHMQVVRKTTSPGEVPLHQVDIPMENGVG-----GNSIFLVA-----PLIIYHV      | 260 |
| hKir7.1 | VRVSAVLVQ-----ERENGLYQTSVDFHLDGI-----SSDECPFFIF-----PLTYYS   | 246 |

\* \* \*

|         |                                                               |     |
|---------|---------------------------------------------------------------|-----|
| AmqKirA | IKETSPLYVINDSILN-EDIEIVIILEATVESTGLTAQALWSYTEREILFNYKFKPMIY   | 325 |
| AmqKirB | IKETSPLYAVINDSILN-EDIEIVIILEATVESTGLTAQALWSYTEREILFGRKFIPMTN  | 330 |
| Nv1     | INDESPFYNVSADNLLR-LDFEVVILLEGIVESTGMTTQARTSYIADEIHWGHNFTLVT   | 287 |
| Nv2     | INEQSPLYDLSAAELAQ-ANIEFVAVLEGVVEATGMVTQGRASYLSSEVHWGHDFYPLML  | 286 |
| Nv3     | IDESPFETMTPKDLRS-DFELVAILEGIVVEATGMLTQAKTSYIGEEILWGYEFKNTLD   | 288 |
| Nv4     | IDERSPLYHHTADKLRH-TKFEIVVLDGIVEATGMNTQPKTSYLSQEILWGHDFLOVD    | 256 |
| rKir1.1 | IDHNSPFYHMAAETLSQ-QDFELVVFLDGTVESTSATCQVRTSYVPEEVLWGHYRFPVIVS | 330 |
| mKir2.1 | IDEDSPLYDLSKQDIDN-ADFEIVVILEGMVEATAMTTCRSSSYLANEILWGHRYEPVLF  | 331 |
| hKir2.2 | IDEASPLFGISRQDLET-DDFEIVVILEGMVEATAMTTCARSSSYLANEILWGHRFEPVLF | 332 |
| hKir3.1 | IDAKSPFYDLSQRSMT-EOFEIVVILEGIVETTGMTTCQARTSYTEDEVWGHRRFFPVIS  | 332 |
| hKir3.4 | INEKSPFYMMSQAQLHQ-EEFEVVVILEGMVEATGMTTCARSSYMDTEVLWGHRRFTPVLT | 338 |
| hKir4.1 | VDETSPLKDPPLCS-GE-GDFELVILSGTVESTSATCQVRTSYLPEEILWGYEFTPAIS   | 316 |
| hKir5.1 | IDHESPLYADRKAVAK-DNFEIVVTFIYTGDSGTSHQSRSSYVPREILWGHRRFNDVLE   | 315 |
| hKir6.2 | IDANSPLYDLAPSDLHHHODLEIIVVILEGVVETTGITTCARTSYLADEILWGORFVPIVA | 320 |
| hKir7.1 | ITPSSPLATLQHE-NP-SHFELVVFLSAMQEGTGEICQRTSYLPSEIMLHHCFFASLLT   | 304 |

\*

|         |                                                              |     |
|---------|--------------------------------------------------------------|-----|
| AmqKirA | RQSDAKGTWEVDENRLSSIEPCSC-----                                | 349 |
| AmqKirB | REKTAKGTWEVDKRLSDVVTSEGINM-----                              | 357 |
| Nv1     | YDCFKNCAMHIDFSRFHDTYPVD-TPRCSAR--ELN-----                    | 320 |
| Nv2     | KAADTPDRLEIDFSLFDHTYASS-TPPCSAR--E-----                      | 317 |
| Nv3     | HTSWKAGRFVNVSHFDRVVPVDTPRVSA-----                            | 317 |
| Nv4     | QSPFDVQYMASDYSKFDDMKKVAMPDLSPFYEQHPLRDENDTSLPNLYI-----       | 307 |
| rKir1.1 | KT--KEGKRVDFHNFEGKIVEVETPHCAMCLY-----                        | 360 |
| mKir2.1 | E---EKHYMKVDYSRFHKTYEVPNTPLCSAR--DLAEKKYILSNANSFCYENEV-----  | 380 |
| hKir2.2 | E---EKNQMKIDYSHFHKTYEVPSTPRCSAR--DLVENKFLPSANSFCYENEL-----   | 381 |
| hKir3.1 | L---EEGFVKVDYSQFHATFEVP-TPPYSVK--EQEEMLLMSSPLIAPAITNSKERHNSV | 386 |
| hKir3.4 | L---EKGFVEVDNTHFDHTYETN-TPSCCAK--ELAEMKRE-----               | 373 |
| hKir4.1 | LS--ASEKVIADFSLEFDQVVKVASPSGLRDSTVRYGD-----                  | 351 |
| hKir5.1 | V---KRKYMKVNCLOFEGSVEVY-APFCSAKQLDWKDOQLHIEKAPPVRESCTS-----  | 365 |
| hKir6.2 | E---EDGRYSVDYSKFGNTVKVP-TPLCAR--QLDEDHSLLEALT---LASAR-----   | 365 |
| hKir7.1 | RG--SKGEYQIKMENFDKIVPEFPPTPLVSKS-----                        | 333 |
